# Supplementary material for: Evaluating the Effectiveness of Regional Ecological Civilization Policy: Evidence from Jiangsu Province, China
Source: MDPI journal article supplement (doi:10.3390/ijerph19010388), 2021-12-30
Supplement: s1 [file s1]

**Table S1: List of Ecological Civilization Construction Policies of Jiangsu Province from 2004 to 2019**

| <b>Years</b> | <b>Publishing department</b>                                             | <b>Names of policy documents</b>                                                                                                                                                                                                                                                                 | <b>File number</b>  |
|--------------|--------------------------------------------------------------------------|--------------------------------------------------------------------------------------------------------------------------------------------------------------------------------------------------------------------------------------------------------------------------------------------------|---------------------|
| 2004.12.28   | Jiangsu Provincial People's Government                                   | Notice of the Jiangsu Provincial People's Government on Printing and Distributing the Outline of the Construction Plan of Jiangsu Ecological Province                                                                                                                                            | SZF [2004] No.6     |
| 2005.09.15   | General Office of the Jiangsu Provincial People's Government             | Notice of the General Office of the Provincial Government on Printing and Distributing the Decompression Table of Key Construction Projects of Ecological Province                                                                                                                               | SZBF [2005] No.103  |
| 2006.06.23   | General Office of the Jiangsu Provincial People's Government             | Notice on Forwarding Provincial Financial Stability Work Coordination Group's Guidance on the Construction of Financial Ecological Environment in the Province                                                                                                                                   | SZBF [2006] No.50   |
| 2007.01.12   | General Office of the Jiangsu Provincial People's Government             | Notice of the General Office of the Provincial Government on Studying and Formulating the Main Tasks and Key Projects for the Construction of the Ecological Province in 2007                                                                                                                    | SZBF [2007] No.3    |
| 2007.08.14   | General Office of the Jiangsu Provincial People's Government             | Notice of the Provincial Government Office to Forward the Implementation Opinions of the Provincial Financial Stability Work Coordination Group Office on the Construction of Financial Ecological County in Jiangsu Province                                                                    | SZBF [2007] No.100  |
| 2008.02.03   | General Office of the Jiangsu Provincial People's Government             | Notice of the General Office of the Provincial Government on the Release of the Provincial Ecological Public Welfare Forest Area Index                                                                                                                                                           | SZBF [2008] No.6    |
| 2008.04.28   | CPC Jiangsu Provincial Committee, Jiangsu Provincial People's Government | Notice of the General Office of the People's Government of Jiangsu Province on Printing and Distributing the "Eleventh Five-Year Plan for Environmental Protection and Ecological Construction of Jiangsu Province"                                                                              | SZBF [2008] No.26   |
| 2009.04.09   | Education Department of Jiangsu                                          | Notice of the Jiangsu Provincial Greening Committee, the Jiangsu Provincial Department of Education, and the Jiangsu Provincial Forestry Bureau on Jointly Launching the Activities of "Promoting Ecological Civilization and Building a Green Campus Together"                                  | SLW [2009] No.2     |
| 2009.06.29   | Jiangsu Forestry Bureau                                                  | Notice of the Jiangsu Provincial Forestry Bureau, the Jiangsu Provincial Department of Education, and the Jiangsu Provincial Committee of the Communist Youth League on the Establishment of the "Jiangsu Ecological Civilization Education Base"                                                | SLF [2009] No.9     |
| 2009.06.29   | Jiangsu Forestry Bureau                                                  | Notice of the Jiangsu Provincial Forestry Bureau, the Jiangsu Provincial Department of Education, and the Jiangsu Provincial Committee of the Communist Youth League on Printing and Distributing the Administrative Measures for the Ecological Civilization Education Base of Jiangsu Province | SLF [2009] No.10    |
| 2010.11.18   | Jiangsu Provincial People's Government                                   | "Opinions of the Jiangsu Provincial Committee of the Communist Party of China and the People's Government of Jiangsu Province on Accelerating the Construction of the Ecological Province and Improving the Level of Ecological Civilization in an All-round Way"                                | SF [2010] No.24     |
| 2011.04.22   | Jiangsu Higher People's Court                                            | Opinions of the Jiangsu Higher People's Court on Providing Judicial Protection for Accelerating the Construction of Ecological Province and Promoting the Level of Ecological Civilization                                                                                                       | SGF [2011] No.201   |
| 2011.08.30   | Jiangsu Provincial People's Government                                   | Notice of the CPC Jiangsu Provincial Committee and the Jiangsu Provincial People's Government on Printing and Distributing the Action Plan for Promoting Ecological Civilization Construction Project                                                                                            | SF [2011] No.26     |
| 2012.03.13   | Jiangsu Provincial Department of Land and Resources                      | Notice of the Jiangsu Provincial Department of Land and Resources on the Tasks for the Construction of Ecological Civilization Construction Projects                                                                                                                                             | SGTZF [2012] No.104 |

|            |                                                                          |                                                                                                                                                                                                                                                                          |                            |
|------------|--------------------------------------------------------------------------|--------------------------------------------------------------------------------------------------------------------------------------------------------------------------------------------------------------------------------------------------------------------------|----------------------------|
|            |                                                                          | (Abandoned Mine Geological Environment Management) in 2011-2015                                                                                                                                                                                                          |                            |
| 2012.04.01 | Jiangsu Provincial Department of Environmental Protection                | Notice on Carrying out the 2011 Eco-Civilization and Eco-Civil Envoys Appraisal and Recognition Activities                                                                                                                                                               | SHB<br>[2012]<br>No.70     |
| 2012.04.17 | Jiangsu Provincial People's Government                                   | Notice of the Provincial Government on Printing and Distributing the "Twelfth Five-Year Plan" Environmental Protection and Ecological Construction Plan of Jiangsu Province                                                                                              | SZF<br>[2012]<br>No.51     |
| 2013.02.25 | Jiangsu Provincial People's Government                                   | Several Opinions of the Provincial People's Government on Strengthening Environmental Protection and Promoting the Construction of Ecological Civilization                                                                                                               | SZF<br>[2013]<br>No.11     |
| 2013.04.02 | General Office of the Jiangsu Provincial People's Government             | Notice of the General Office of the Provincial Government on Printing and Distributing the Division of Labor of the Key Work Departments of the "Twelfth Five-Year Plan" for Environmental Protection and Ecological Construction in Jiangsu Province                    | SZBF<br>[2013]<br>No.43    |
| 2013.04.19 | Jiangsu Provincial Department of Environmental Protection                | Notice on Hosting the Jiangsu Province Green School Ecological Civilization Performance Competition                                                                                                                                                                      | SHB<br>[2013]<br>No.106    |
| 2013.06.14 | Jiangsu Provincial Department of Water Resources                         | Provincial Water Resources Department's Opinions on Promoting the Construction of Water Ecological Civilization                                                                                                                                                          | SSZ<br>[2013]<br>No.26     |
| 2013.06.18 | Jiangsu Provincial Department of Water Resources                         | Notice of Jiangsu Provincial Department of Water Resources on Launching Pilot Work of Water Ecological Civilization Construction in the Province                                                                                                                         | SSZ<br>[2013]<br>No.30     |
| 2013.07.20 | Jiangsu Provincial People's Government                                   | Notice of the Provincial Government on Printing and Distributing the Planning of Ecological Civilization Construction in Jiangsu Province (2013-2022)                                                                                                                    | SZF<br>[2013]<br>No.86     |
| 2013.07.21 | CPC Jiangsu Provincial Committee, Jiangsu Provincial People's Government | Opinions of the CPC Jiangsu Provincial Committee and the Jiangsu Provincial People's Government on Deeply Advancing the Construction of Ecological Civilization and Taking the Lead in Building the National Ecological Civilization Construction Demonstration Zone     | SF<br>[2013]<br>No.11      |
| 2013.08.09 | Jiangsu Provincial Department of Environmental Protection                | Notice on Printing and Distributing the Evaluation Standards of Ecological Civilization Education Base in Jiangsu Province                                                                                                                                               | SHB<br>[2013]<br>No.217    |
| 2013.08.09 | Jiangsu Provincial Department of Environmental Protection                | Notice on Printing and Distributing the Administrative Measures for the Ecological Civilization Education Base of Jiangsu Province                                                                                                                                       | SHB<br>[2013]<br>No.218    |
| 2013.09.23 | Jiangsu Provincial People's Government                                   | Notice of the Provincial Government on Printing and Distributing the Regional Protection Plan for Ecological Red Lines in Jiangsu Province                                                                                                                               | SZF<br>[2013]<br>No.113    |
| 2013.09.25 | Jiangsu Provincial Department of Water Resources                         | Notice of Jiangsu Provincial Department of Water Resources on Piloting the Construction of Water-Ecological Civilized City in the Province                                                                                                                               | SSZ<br>[2013]<br>No.48     |
| 2013.12.26 | General Office of the Jiangsu Provincial People's Government             | Circular of the General Office of the Provincial Government on Forwarding the Interim Measures for the Transfer of Ecological Compensation Transfers of Jiangsu Provincial Department of Environmental Protection                                                        | SZBF<br>[2013]<br>No.193   |
| 2014.03.13 | General Office of the Jiangsu Provincial People's Government             | Notice of the General Office of the Provincial Government on Forwarding the Interim Measures for the Provincial Environmental Protection Supervision and Management Assessment of the Provincial Red Department of the Provincial Department of Environmental Protection | SZBF<br>[2014]<br>No.23    |
| 2015.07.06 | Jiangsu Forestry Bureau                                                  | Notice on Printing and Distributing the "Jiangsu Province Ecological Protection and Construction Plan (2014-2020)"                                                                                                                                                       | SFGNJF<br>[2015]<br>No.667 |
| 2015.10.20 | Jiangsu Provincial People's Government                                   | "Implementation Opinions of Jiangsu Provincial Party Committee and Provincial Government on                                                                                                                                                                              | SF<br>[2015]               |

|            |                                                                                                                      |                                                                                                                                                                                                                                                                                         |                          |
|------------|----------------------------------------------------------------------------------------------------------------------|-----------------------------------------------------------------------------------------------------------------------------------------------------------------------------------------------------------------------------------------------------------------------------------------|--------------------------|
|            |                                                                                                                      | Accelerating the Construction of Ecological Civilization"                                                                                                                                                                                                                               | No.30                    |
| 2016.07.01 | General Office of the CPC Jiangsu Provincial Committee; General Office of the Jiangsu Provincial People's Government | "Implementation Rules for the Investigation of Responsibility for Ecological Environment Damage of Leading Cadres of the Party and Government in Jiangsu Province"                                                                                                                      | SBF<br>[2016]<br>No.10   |
| 2016.08.22 | General Office of the CPC Jiangsu Provincial Committee                                                               | Notice of the Jiangsu Provincial People's Government of the Jiangsu Provincial Committee of the Communist Party of China on Printing and Distributing the "Provisions on the Responsibility of Ecological Environment Protection in Jiangsu Province (Trial)"                           | SF<br>[2016]<br>No.37    |
| 2016.12.06 | Jiangsu Provincial People's Government                                                                               | Notice of the Provincial Government on Printing and Distributing the Implementation Plan for the Pilot Work of the Reform of the Compensation System for Ecological Environment Damage in Jiangsu Province                                                                              | SZF<br>[2016]<br>No.159  |
| 2017.01.19 | Jiangsu Provincial People's Government                                                                               | Notice of the Provincial Government on Printing and Distributing the Implementation Plan for the Construction of the Ecological Protection Network in the Subei Area of Northern Jiangsu                                                                                                | SZF<br>[2017]<br>No.7    |
| 2017.05.15 | General Office of the Jiangsu Provincial People's Government                                                         | Guiding Opinions of the General Office of the Provincial Government on Promoting the Construction of Ecological Protection Leading Areas and Ecological Protection Special Zones                                                                                                        | SZBF<br>[2017]<br>No.73  |
| 2017.06.20 | General Office of the Jiangsu Provincial People's Government                                                         | Notice of the General Office of the Provincial Government on Printing and Distributing the Implementation Plan for the Construction of the Ecological Environment Monitoring Network of Jiangsu Province                                                                                | SZBF<br>[2017]<br>No.91  |
| 2017.08.25 | General Office of the Jiangsu Provincial People's Government                                                         | Notice on Printing and Distributing the Management Regulations and Indicators of Model City and County (City, District) for the Construction of Ecological Civilization in Jiangsu Province                                                                                             | SHB<br>[2017]<br>No.259  |
| 2017.08.25 | General Office of the Jiangsu Provincial People's Government                                                         | Notice on Printing and Distributing Model Townships (Streets) and Village Management Regulations and Indicators for Ecological Civilization Construction in Jiangsu Province                                                                                                            | SHB<br>[2017]<br>No.260  |
| 2017.10.09 | Jiangsu Provincial People's Government                                                                               | Notice of the Provincial Government on Printing and Distributing the Ecological River and Lake Action Plan of Jiangsu Province (2017-2020)                                                                                                                                              | SZF<br>[2017]<br>No.130  |
| 2017.12.24 | General Office of the Jiangsu Provincial People's Government                                                         | Opinions of the General Office of the Provincial Government on Accelerating the Construction of Ecological Agriculture in the Taihu Basin                                                                                                                                               | SZBF<br>[2017]<br>No.153 |
| 2018.06.09 | Jiangsu Provincial People's Government                                                                               | Notice of Provincial Government on Printing and Distributing the National Protection Plan for Ecological Red Lines in Jiangsu Province                                                                                                                                                  | SZF<br>[2018]<br>No.74   |
| 2018.08.30 | CPC Jiangsu Provincial Committee, Jiangsu Provincial People's Government                                             | Notice of the General Office of the CPC Jiangsu Provincial Committee and the General Office of the Jiangsu Provincial Government on Printing and Distributing "the Implementation Plan for the Reform of the Compensation System for Ecological Environment Damage in Jiangsu Province" | SBF<br>[2018]<br>No.38   |
| 2018.10.07 | General Office of the CPC Jiangsu Provincial Committee                                                               | Implementation Opinions of the CPC Jiangsu Provincial Committee and the Jiangsu Provincial People's Government on Comprehensively Strengthening Ecological Environmental Protection and Resolutely Fighting Pollution Prevention and Control                                            | SF<br>[2018]<br>No.24    |
| 2018.12.18 | General Office of the Jiangsu Provincial People's Government                                                         | Notice of the General Office of the Provincial Government on Printing and Distributing the Implementation Plan for the Protection of Urban Centralized Drinking Water Sources in Jiangsu Province                                                                                       | SZBF<br>[2018]<br>No.107 |
| 2019.01.15 | General Office of the Jiangsu Provincial People's Government                                                         | Notice of the General Office of the Provincial Government on Printing and Distributing the Implementation Plan for the Battle of Taihu Lake Governance in Jiangsu Province                                                                                                              | SZBF<br>[2019]<br>No.4   |

|            |                                                              |                                                                                                                                                                                                                     |                   |
|------------|--------------------------------------------------------------|---------------------------------------------------------------------------------------------------------------------------------------------------------------------------------------------------------------------|-------------------|
| 2019.01.17 | General Office of the Jiangsu Provincial People's Government | Implementation Opinions of the General Office of the Provincial Government on Strengthening the Protection of Aquatic Organisms of the Yangtze River in the Jiangsu Section                                         | SZBF [2019] No.7  |
| 2019.03.06 | General Office of the Jiangsu Provincial People's Government | Notice of the General Office of the Provincial Government on Printing and Distributing the Implementation Plan for the Construction of Ecological Environmental Standards System in Jiangsu Province (2018-2022)    | SZBF [2019] No.26 |
| 2019.03.07 | General Office of the Jiangsu Provincial People's Government | Notice of the General Office of the Provincial Government on Printing and Distributing the Three-Year Environmental Infrastructure Construction Plan in Jiangsu Province (2018-2020)                                | SZBF [2019] No.25 |
| 2019.03.07 | General Office of the Jiangsu Provincial People's Government | Notice of the General Office of the Provincial Government on Printing and Distributing the Three-year Construction Plan for Ecological Environment Monitoring and Monitoring System in Jiangsu Province (2018-2020) | SZBF [2019] No.27 |
| 2019.06.02 | General Office of the Jiangsu Provincial People's Government | Notice of the General Office of the Provincial Government on Printing and Distributing the Implementation Plan of the Action Plan for the Protection and Restoration of the Yangtze River in Jiangsu Province       | SZBF [2019] No.52 |
| 2019.08.31 | Jiangsu Provincial People's Government                       | Implementation Opinions of the General Office of the Jiangsu Provincial Government on Strengthening the Ecological Protection and Scientific Utilization of Hongze Lake                                             | SZBF [2019] No.72 |
| 2019.12.20 | General Office of the Jiangsu Provincial People's Government | Notice of the General Office of the Provincial Government on Printing and Distributing the General Work Plan for the Unified Confirmation and Registration of Natural Resources in Jiangsu Province                 | SZBF [2019] No.87 |
